# Supplementary material for: Postmortem Surveillance for Ebola Virus Using OraQuick Ebola Rapid Diagnostic Tests, Eastern Democratic Republic of the Congo, 2019–2020
Source: PubMed Central journal article supplement (PMC8798676; doi:10.3201/eid2802.210981), 2022-02
Supplement: 21-0981-Techapp-s1.pdf [file 21-0981-Techapp-s1.pdf]

# Postmortem Surveillance for Ebola Virus Using OraQuick Ebola Rapid Diagnostic Tests, Eastern Democratic Republic of the Congo, 2019–2020

## Appendix

**Appendix Table.** Epidemiologic information and results of quantitative reverse transcription PCR of reactive results of suspected Ebola samples during postmortem testing with Oraquick tests

| Sample   | Age/sex | Health area  | Health zone | Sampling date,<br>2019 | Epidemiologic<br>link | Oraquick Ebola | Gene Xpert® Ebola |         |          |         |
|----------|---------|--------------|-------------|------------------------|-----------------------|----------------|-------------------|---------|----------|---------|
|          |         |              |             |                        |                       |                | NP                | CT (NP) | GP       | CT (GP) |
| Death 1  | –/F*    | Some         | Mambasa     | Nov 14                 | Yes                   | Reactive       | Negative          | 0       | Negative | 0       |
| Death 2  | 19/F    | Lwemba       | Mandima     | Nov 23                 | No                    | Reactive       | Positive          | 25.8    | Positive | 21.0    |
| Death 3  | 20/M    | Biakato-mine | Mandima     | Nov 27                 | Yes                   | Reactive       | Positive          | 18.1    | Positive | 22.9    |
| Death 4  | 22/F    | Lwemba       | Mandima     | Nov 27                 | Yes                   | Reactive       | Positive          | 24.1    | Positive | 19.7    |
| Death 5  | 1/M     | Biakato-mine | Mandima     | Nov 30                 | Yes                   | Reactive       | Negative          | 0       | Negative | 0       |
| Death 6  | 0/M     | Biakato-mine | Mandima     | Dec 2                  | Yes                   | Reactive       | Negative          | 0       | Negative | 0       |
| Death 7  | 20/F    | Masosi       | Oicha       | Dec 4                  | Yes                   | Reactive       | Positive          | 27.7    | Positive | 31.4    |
| Death 8  | 44/M    | Lwemba       | Mandima     | Dec 5                  | No                    | Reactive       | Positive          | 23.7    | Positive | 19.5    |
| Death 9  | 22/F    | Aloya        | Mabaloko    | Dec 6                  | Yes                   | Reactive       | Positive          | 23.6    | Positive | 19.9    |
| Death 10 | 4/M     | Aloya        | Mabaloko    | Dec 22                 | Yes                   | Reactive       | Positive          | 15.8    | Positive | 12.3    |
| Death 11 | 1/F     | Aloya        | Mabaloko    | Dec 23                 | No                    | Reactive       | Positive          | 20.9    | Positive | 16.2    |
| Death 12 | 65/F    | †            | Oicha       | Dec 23                 | No                    | Reactive       | Negative          | 0       | Negative | 0       |

\*Unknown age

†Unknown health area.
